# Supplementary material for: Anti-Inflammatory and Antioxidant Properties of the Extract, Tiliroside, and Patuletin 3-O-β-D-Glucopyranoside from Pfaffia townsendii (Amaranthaceae)
Source: PubMed Central journal article supplement (PMC6186378; doi:10.1155/2018/6057579), 2018-09-30

# Anti-inflammatory and Antioxidant Effects of *Pfaffia townsendii*

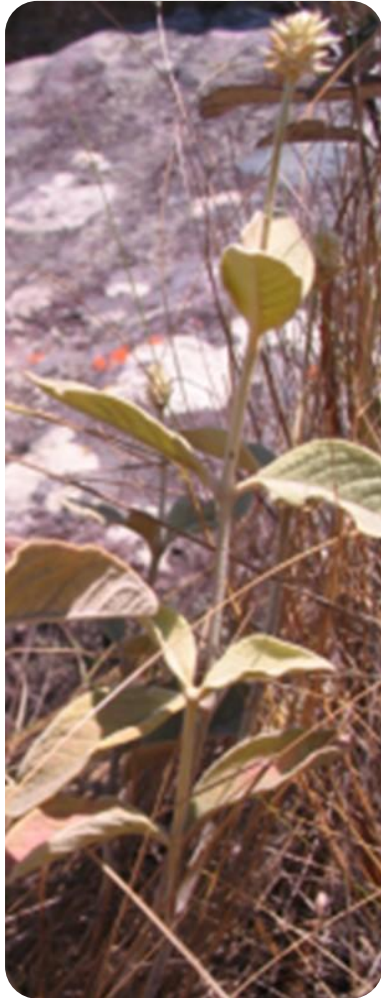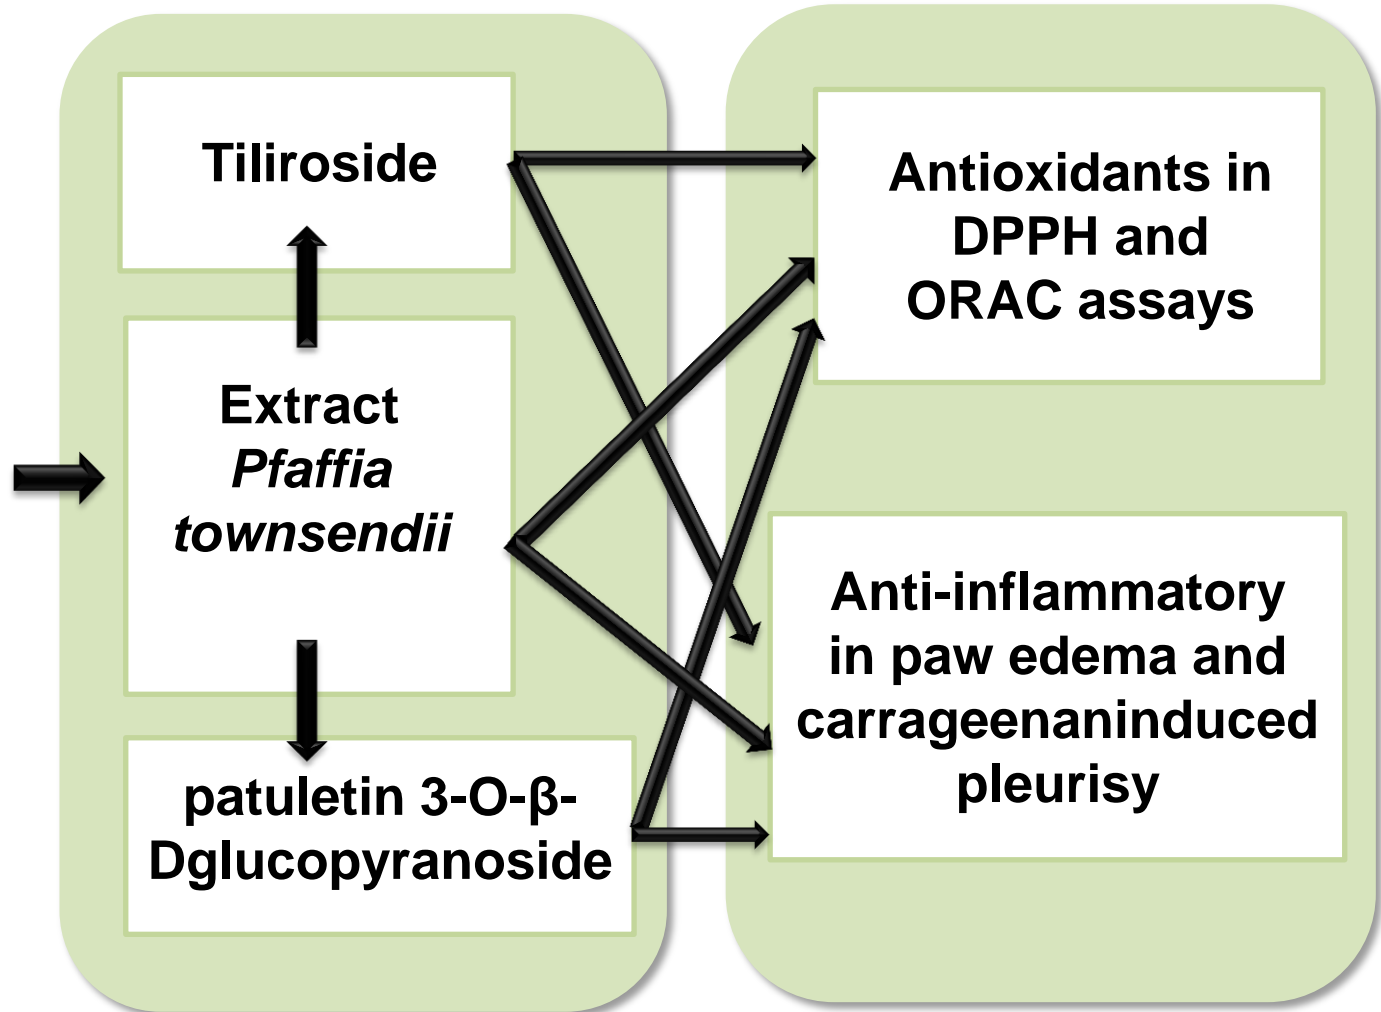

Supplement: 6057579.f1.pdf [file 6057579.f1.pdf]
